1

2

3

4 Drug target discovery via network modeling: a mathematical  
5 model of the *E. coli* folate network response to trimethoprim

6

7

8 Inderpreet Jalli<sup>1¶\*</sup>, Sophia Lunt<sup>2¶</sup>, Wenjia Xu<sup>1&</sup>, Carmen Lopez<sup>1&</sup>, Andreas Contreras<sup>1&</sup>,  
9 Cari-Sue Wilmot<sup>3&</sup>, Timothy Shih<sup>1&</sup>, Frederik Nijhout<sup>1¶</sup>

10

11

12

13 <sup>1</sup>Department of Biology, Duke University, Durham, North Carolina, United States of America

14 <sup>2</sup>Department of Biology, Michigan State University, East Lansing, Michigan, United States of

15 America

16 <sup>3</sup>Department of Earth and Atmospheric Science, University of Houston, Houston, Texas, United  
17 States of America

18

19

20 \*Corresponding author

21 Email: [inderjalli@gmail.com](mailto:inderjalli@gmail.com) (IJ)

22

23

24 ¶ These members contributed equally to this work.

25 & These members also contributed equally to this work.

## 1 Abstract

2           The antibiotic trimethoprim targets the bacterial dihydrofolate reductase enzyme and  
3 subsequently affects the entire folate network. We present an expanded mathematical model of  
4 trimethoprim's action on the *Escherichia coli* folate network that greatly improves upon Kwon *et*  
5 *al.* (2008). The improvement upon the Kwon Model lends greater insight into the effects of  
6 trimethoprim at higher resolution and accuracy. More importantly, the presented mathematical  
7 model enables drug target discovery in a way the earlier model could not. Using the improved  
8 mathematical model as a scaffold, we use parameter optimization to search for new drug targets  
9 that replicate the effect of trimethoprim. We present the model and model-scaffold strategy as  
10 an efficient route for drug target discovery.

11

## 12 Introduction

### 13 Antibiotic resistance

14           Antibiotic resistance is a major health policy concern. New and resistant forms of  
15 common infections such as tuberculosis necessitate urgent drug development efforts [1-3].  
16 Strategies such as discovering new bacterial communication networks and inhibiting these  
17 networks are a popular avenue for drug discovery yet are very expensive in both time and  
18 resources. Utilizing math models to gain a greater level of insight into the mechanisms of known  
19 drugs may offer opportunities for drug development, using well-studied and richly described  
20 pathways that already show weakness to chemical intervention to search for new potential  
21 targets [4]. The presented work models the mechanism of a common antibiotic, trimethoprim, at

22 the biological information layer at which it functions, the metabolic network level. This is done  
23 not only to study the mechanism of trimethoprim but to find alternatives to it by attempting to  
24 replicate its effect on the folate network, which is known to be critical to cell function. The  
25 presented mathematical model improves on previous work by providing a higher resolution  
26 model of Trimethoprim's effect on *E. coli*. Without a highly detailed model of the bacterial folate  
27 network and trimethoprim's effect on it, the presented strategy of drug target discovery would  
28 not be possible.

## 29 The folate network and trimethoprim

30 The folate network is a traditional therapeutic target for both cancerous and bacterial  
31 cells due to the integral role folates play in cell division [5, 6]. The folate network provides and  
32 accepts one-carbon units for the biosynthesis of amino acids and metabolites such as S-adenosyl  
33 methionine (SAM), the universal methyl group donor [7-9]. The antibiotic trimethoprim (TM)  
34 inhibits the activity of bacterial dihydrofolate reductase (DHFR), an enzyme that converts  
35 dihydrofolate (DHF) to tetrahydrofolate (THF, Fig 1). DHFR inhibition causes a spike in DHF. DHF  
36 in turn inhibits folypolyglutamate gamma synthetase (FPGS), the enzyme tasked with adding  
37 glutamates to THF and its derivatives [10, 11]. Because folate-catalyzed conversions of one-  
38 carbon units are sensitive to glutamation levels of folates, the inhibition of FPGS disrupts critical  
39 cell functions [11-14].

40 **Fig 1. A simplistic diagram of effect of trimethoprim on DHFR and FPGS, roughly approximated in Kwon**  
41 **Model.**

42 Boxes = metabolites or antibiotics. Ovals = enzymes, connected to solid lines with arrows indicating  
43 metabolite conversions. Dashed lines = inactivation. Trimethoprim inhibits DHFR, which converts  $DHF_1$  to  
44  $THF_1$ , leading to a spike in  $DHF_1$ . FPGS adds a glutamate to  $THF_1$ , and  $THF_2$ , converting each to  $THF_2$ , and  
45  $THF_3$ , respectively.

46

## 47 Folate network models and drug target search

48 Kwon *et al.* wrote a mathematical model of the disruptive effect of TM focused on folate  
49 interconversions which roughly has the structure and resolution of Fig 1, and which we refer to  
50 as the *Kwon Model* [10]. The *Kwon Model* compressed all derivatives of THF into three variables,  
51 but Kwon *et al.* recorded experimental data for many THF derivatives. In this work we present a  
52 higher resolution version of the *Kwon Model* referred to as the *TM Model*, that exploits the  
53 experimental data recorded by Kwon *et al.* The structure of the *TM Model* is shown in Fig 2. We  
54 then use the current *TM Model* as a scaffold for drug target searching by replicating the effects  
55 of TM on the *E. coli* folate network without inhibiting DHFR or FPGS. In doing this we create a  
56 *Rewired Model* that shows a simulated time-course progression similar to the *TM Model*, but  
57 without TM in the simulation. This overall strategy is outlined in Fig 3. The *TM Model* by the  
58 nature of its higher resolution, higher number of enzyme and metabolite nodes, and higher  
59 accuracy of describing the effect of TM on the folate network, allows for TM alternatives to be  
60 explored in a way that the *Kwon Model* cannot. Since multiple interconversions of THF<sub>n</sub> and DHF<sub>n</sub>  
61 are described in the *TM Model*, substituting TM with other possible disruptors of the folate  
62 network is feasible, guided by Kwon *et al.*'s experimental data. This approach allows us to  
63 propose new targets for antibiotic activity that would be advantageous against TM-resistant  
64 bacteria, and provides a guide for future work on other systems that evolve in response to  
65 chemical therapeutics [15, 16].

66 **Fig 2. TM Model of *E. coli* folate network.**

67 (Ovals = enzymes modeled with Michaelis-Menten equations; boxes = metabolites, TM, or source; dashed  
68 lines = inhibitions; straight lines without attached oval = linear conversions. The source (top left)

69 represents 7,8-dihydropteroate, and mass input is modeled as a linear conversion into DHF<sub>1</sub> only by  
70 dihydrofolate synthase (DFHS). Once DHF<sub>1</sub> is produced, it is converted into THF<sub>1</sub> via DHFR. TM inhibits all  
71 DHFR activity. THF<sub>1</sub> is converted into THF<sub>2</sub> and then to THF<sub>3</sub> by FPGS, which also works on all THF<sub>n</sub>  
72 derivatives (except 5MTHF<sub>n</sub>), indicated by thin solid lines. Only FPGS carries out interconversions between  
73 glutamation states. All FPGS activities have independent parameter sets. DHF<sub>n</sub> inhibits FPGS activity. TS  
74 converts 510MTHF<sub>n</sub> to DHF<sub>n</sub>. SHMT converts THF<sub>n</sub> to 510MTHF<sub>n</sub>, and MTHFR converts 510mTHF<sub>n</sub> to  
75 5MTHF<sub>n</sub>. MS does not convert monoglutamates of 5MTHF<sub>n</sub> to THF<sub>n</sub>, but its arrow is shown as other  
76 enzymes for simplicity. DHF<sub>n</sub> is converted into pAB<sub>n</sub> and Pte<sub>n</sub>, which act as sinks for the system.  
77 Experimental concentration data exists for all metabolites shown in the figure. Pte<sub>n</sub> inhibits TS and MS,  
78 THF<sub>n</sub> inhibits SHMT, and 510MTHF<sub>n</sub> inhibits MTHFR. These inhibitions however are not as strong as that of  
79 TM on DHFR. Formyl THF<sub>n</sub> derivatives were not included due to a lack of experimental data.

80

### 81 Fig 3. Drug target searching requires high resolution models.

82 The Kwon Model is improved upon to create the TM model, which has more metabolite and enzyme  
83 nodes. The TM model describes the effects of TM at high resolution and accuracy. The TM model, once  
84 developed, is used as a scaffold for drug target searching (Rewired Model). The Kwon Model, due to  
85 having only two enzymes (approximated in Fig 1) and compressing all forms of THF into just three nodes,  
86 is not viable for drug target discovery (pathway on left).

87

## 88 Abbreviations

89 Enzymes are listed with abbreviation, name, and Uniprot ID and/or EC number. A  
90 subscript indicates the number of glutamates added onto a molecule. Terms such as DHF<sub>n</sub> refer  
91 to molecules that vary only in number of glutamates. DHFR: dihydrofolate reductase (POAFS3 /  
92 EC: 1.5.1.3), DHFS: dihydrofolate synthase (P08192 / EC: 6.3.2.12), SHMT: serine  
93 hydroxymethyltransferase (POA825 / 2.1.2.1), MTHFR: methylenetetrahydrofolate reductase  
94 (P42898 / 1.5.1.20), TS: thymidylate synthase (POA884 / EC: 2.1.1.45), METH: methionine  
95 synthase (P13009 / EC: 2.1.1.13), METE/MS: B12 independent methionine synthase (P25665 /  
96 EC: 2.1.1.14), FPGS: folypolyglutamate synthetase (P08192 / EC: 6.3.2.17), MET: L-methionine,  
97 SAM: S-adenosyl-L-methionine, SRH: S-ribosyl-L-homocysteine, SAH: S-adenosyl-L-homocysteine,  
98 HCY: L-homocysteine, TM: trimethoprim, Pte<sub>n</sub>: folate glutamate, pABA: para-aminobenzoate,

99 pAB<sub>n</sub>: para-aminobenzoylglutamate, DHF<sub>n</sub>: dihydrofolate, DHP: dihydropteroic acid, THF<sub>n</sub>:  
100 tetrahydrofolate, 5MTHF<sub>n</sub>: 5-methyl-THF, 510MTHF<sub>n</sub>: 5,10-methylene-THF. Enzyme parameters  
101 are referred to with enzyme abbreviation followed by the type of parameter, then the glutamate  
102 that is being acted upon, e.g. DHFR<sub>KM1</sub> refers to DHFR's *K<sub>m</sub>* constant for DHF<sub>1</sub>. The included  
103 models are heavily focused on the differing activities of enzymes on a variety of unique  
104 glutamations of molecules such as THF<sub>n</sub>. The velocities of enzymes are denoted by the enzyme  
105 abbreviation and then the glutamation level of the general molecule they are named for acting  
106 upon. For example, DHFR1 refers to the velocity of DHFR's activity on DHF<sub>1</sub>. In the case of FPGS  
107 which works on THF<sub>n</sub> and its derivatives with differing affinities (except for 5MTHF<sub>n</sub>), the  
108 substrate and glutamate are used in the velocity or parameter abbreviation: FPGSTHF1 refers to  
109 FPGS activity on the THF<sub>1</sub> substrate. SSE refers to sum of squared errors, a common metric for  
110 describing the accuracy of a prediction to the real world data.

## 111 **Materials and Methods**

### 112 **Experiments**

113 Folate concentrations were measured absolutely as described in Kwon *et al.* [10, 11].  
114 Time course progression of folate concentrations and their glutamations can be seen in Fig 4. All  
115 rates and velocities are shown in  $\mu\text{M}/\text{minute}$ . TM was added to *E. coli* growth medium at O.D.  $\sim$   
116 0.5 at a concentration of 4  $\mu\text{g}/\text{mL}$ , immediately after time zero data point collection [10]. *E. coli*  
117 strain NCM3722 was used for all experiments [10]. Cells were grown in Gutnick minimal salts  
118 medium (Sigma-Aldrich), in a shaking flask at 37°C.

## 119 Mathematical modeling of the *TM Model*

120 All simulations and calculations were carried out in Matlab version 2014a (Simbiology  
121 Toolbox), on an Intel Q8200 2.33GHz processor, using Microsoft Windows 7, 64-bit, and ODE  
122 solver ode15s. Fig 2 displays the structure of the *TM Model*. Variables are concentrations of  
123  $DHF_n$ ,  $pAB_n$ ,  $Pte_n$ ,  $THF_n$ , and all  $THF_n$  derivatives, at three glutamation levels. Variable time-course  
124 progression is fitted to experimental data shown in Fig 4. The *Kwon Model* summated all  $THF_n$   
125 and  $THF_n$  derivatives into three variables:  $THF_1$ ,  $THF_2$ , and  $THF_3$ . The *Kwon Model* had a lower  
126 number of enzyme kinetics equations describing interconversions of  $DHF_n$  and  $THF_n$  [10]. In the  
127 current *TM Model*,  $THF_n$  and  $THF_n$  derivatives are treated as independent variables, requiring a  
128 higher number of detailed enzyme kinetics equations to describe interconversions. This  
129 treatment of  $THF_n$  derivatives as unique variables allows for high resolution modeling and the  
130 creation of the *Rewired Model*. Creating the *Rewired Model* would not be possible at the  
131 resolution of the *Kwon Model* because insufficient enzyme nodes exist for a parameter search.  
132 Conversion of  $DHF_n$  to  $THF_n$  by DHFR was modeled by a variant of the Michaelis-Menten  
133 equation featuring competitive inhibition:

$$134 \quad v = \frac{d[P]}{dt} = \frac{V_{max} * [S]}{K_m * \left(1 + \frac{[I]}{K_i}\right) + [S]}$$

135 Where  $K_m$  is the Michaelis constant,  $[S]$  is the concentration of the substrate,  $K_i$  is the inhibition  
136 constant for TM,  $[I]$  is the constant concentration of TM, and  $V_{max}$  is the maximum rate  
137 achieved by the enzyme. TM was added to simulations at 40 seconds to reflect experimental  
138 protocol. Kwon *et al.* measured a significant reduction of input flux after addition of TM, which is



139 included in the model unless otherwise stated [10]. If the Michaelis-Menten equation or a  
140 variant thereof was not used for a metabolite conversion, a linear rate equation was employed  
141 using the form presented below. In the equation below,  $K_s$  represents a linear transform of the  
142 substrate into a product:

$$143 \quad v = [S] * k_s$$

144 **Fig 4. Folate disruption and simulation of the TM Model.**

145 TM in growth media causes a severe deviation from initial folate concentrations (dots with error bars).  
146 THF<sub>n</sub> progression shows high similarity to experimental progression (SSE = 1.83, with THF<sub>2</sub> SSE = 1.64).  
147 DHF<sub>3</sub> similarity is poor (SSE = 8063), creating bulk of error for model (SSE total = 8947). The experimental  
148 time course metabolite concentration data can be found in the data in S3 Table.

149

## 150 **Parameters and parameter estimation in the *TM Model***

151 Parameters are either Michaelis-Menten constants ( $K_m$ ,  $K_i$ ,  $V_{max}$ ) or linear conversion  
152 constants ( $K_s$ ). Some parameters are estimated due to insufficient experimental data in  
153 published literature, or estimated from an initial data set taken from literature, such as IC<sub>50</sub> (half  
154 maximal inhibitory concentration) values. Estimated parameters were determined by fitting  
155 simulations to experimental data via sequential application of the Matlab genetic algorithm and  
156 `fmincon` functions.

## 157 **Creating the *Rewired Model* to explore alternatives to TM**

158 To find an alternative to TM, we first removed the presence of TM in the *TM Model*. The  
159 resultant model with all further modifications is referred to as the *Rewired Model*. We then  
160 inserted a set of *in silico* enzyme inhibitors into the *Rewired Model* via parameter modification of  
161 existing Michaelis-Menten equations with the aim of creating a simulated time-course folate

162 concentration progression of the same nature to that caused by TM. The experimental data used  
163 to fit the *Rewired Model* was the same as that used for the *TM Model*. DHFR and FPGS were not  
164 targeted with *in silico* manipulation in the *Rewired Model* in order to find a true alternative for  
165 TM-resistant bacteria. Parameter optimization functions were used to find the proper  
166 combination of *in silico* inhibitor. Inhibitors were simulated by introducing alterations of the  $K_m$   
167 and  $V_{max}$  parameters used in the *TM Model*.

## 168 Results

### 169 Trimethoprim affects polyglutamation – *TM Model*

170 TM, which is added at 40 seconds into the model simulation, dramatically alters folate  
171 pools in the *TM Model* (Fig 4) which replicates the experimental data in *Kwon et al.* with a total  
172 SSE of 8948. DHF<sub>3</sub> alone has an SSE of 8063 and is responsible for most of the error. The *TM*  
173 *Model* greatly improves upon the simulation resolution of the *Kwon Model* featured in the same  
174 effort [10]. DHF<sub>1</sub> and DHF<sub>2</sub> experience large increases both experimentally and in the *TM Model*.  
175 Simulated DHF<sub>3</sub> experiences a minor spike and then slowly stabilizes to near its original  
176 concentration instead of showing a drop from initial concentration. A key experimental effect of  
177 TM is seen in the model: THF<sub>1</sub> and THF<sub>2</sub> increase after initial drops while THF<sub>3</sub> drops  
178 continuously. THF<sub>n</sub> derivatives 510mTHF<sub>n</sub> and 5mTHF<sub>n</sub> follow similar progressions as seen in  
179 experimental data, with the exception of 5mTHF<sub>3</sub>. Fig 5 highlights critical reaction velocities of  
180 the *TM Model* to show the drivers of folate concentration progression. Velocity of DHFR1 shows  
181 a drop and then a slight rebound, as would be expected due to TM inhibition of DHFR activity.  
182 FPGSTHF1 velocity experiences a sudden drop due to an increase in DHF<sub>n</sub> which inhibit the

183 activity of FPGSTHF1. Parameter estimates, drawn from both experimental work and estimation  
184 *in silico*, are shown in S1 Table.

185 **Fig 5. Velocities of DHFR, MS on 5MTHF<sub>3</sub>, FPGS on THF<sub>1</sub> and THF<sub>2</sub>, under TM.**

186 As expected, velocities drop upon the addition of TM. Some activities such as DHFR on DHF<sub>1</sub> recover  
187 slightly over time. Velocity simulations provide reference that assures drivers of simulation mirror  
188 biological processes.

189

## 190 **Network rewiring to explore TM alternatives – *Rewired Model***

191 To explore an alternative therapeutic approach to TM, a small number of enzyme  
192 inhibitors were added *in silico* while TM was removed, creating the *Rewired Model*. The *Rewired*  
193 *Model's* parameters were fitted to the same experimental data used to create the *TM Model*.  
194 The simulation results of the *Rewired Model* are seen in Fig 6, and the simulated inhibitors are  
195 shown in Table 1. The total SSE of the *Rewired Model* as compared to experimental data is  
196 46794, driven mainly by 5mTHF<sub>3</sub> (SSE = 39929). All THF<sub>n</sub> respond as they did in the *TM Model*  
197 although not as well (*Rewired Model* SSE = 16.41, *TM Model* SSE = 1.83). DHF<sub>n</sub> do not follow the  
198 *TM Model* pattern, dropping in concentration over the course of the simulation. The proposed  
199 inhibitors achieve a partial effect of TM (spiking THF<sub>1</sub>/ THF<sub>2</sub>, dropping THF<sub>3</sub>, alterations of  
200 510mTHF<sub>n</sub>, 5mTHF<sub>n</sub>) without utilizing the DHF spike (further discussion below). *Rewired Model*  
201 reaction velocities are shown in S1 Fig. Most velocities except DHFR1 reach steady state early in  
202 the *Rewired Model*. In addition, velocities such as FPGSTHF1 increase instead of decreasing as  
203 was seen in the *TM Model* (Fig 5).

204 **Fig 6. Rewired Model of E. coli folate to search for new drug targets.**

205 Simulations show an initial disruption of folate concentrations, and then a gradual stabilization. Combined  
206 THF<sub>n</sub> progression shows high similarity to experimental progression.

207 Table 1. Inhibitors added in substitution of TM in Rewired Model.

| Parameters      | <i>TM Model</i> | <i>Rewired Model</i> | Inhibition Type |
|-----------------|-----------------|----------------------|-----------------|
| <b>MSVM3</b>    | 1.40E-01        | 1.00E-02             | Noncompetitive  |
| <b>MTHFRKM2</b> | 2.99E+00        | 3.50E+00             | Competitive     |
| <b>MTHFRKM3</b> | 1.11E-01        | 1.47E+01             | Competitive     |
| <b>SHMTKM3</b>  | 2.58E+01        | 6.80E+00             | Uncompetitive   |
| <b>SHMTVM3</b>  | 4.07E+00        | 3.10E+00             | Uncompetitive   |

208 Enzymes MS, MTHFR, and SHMT are targeted with noncompetitive, competitive, and uncompetitive  
209 inhibitors respectively. TM Model parameters are shown along with inhibition type required to partially  
210 recreate effect of TM (spiking THF<sub>1</sub> / THF<sub>2</sub>, dropping THF<sub>3</sub>, alterations of 510mTHF<sub>n</sub>, 5mTHF<sub>n</sub>) in Rewired  
211 Model.

212

## 213 Discussion

### 214 The effect of trimethoprim – *TM Model*

215 The *TM Model* shows a more accurate and expanded view of the folate network than the  
216 previous effort in Kwon *et al.* [10]. SSE scores cannot truly be compared from *TM Model* to *Kwon*  
217 *Model* due to the large increase in metabolites modeled. The explicit addition of TM and THF<sub>n</sub>  
218 derivatives are the key differences between the *TM Model* and the *Kwon Model*. THF<sub>n</sub> derivatives  
219 510mTHF<sub>n</sub> and 5mTHF<sub>n</sub> were collapsed into THF<sub>n</sub> in the *Kwon Model*. In the *TM Model* they are  
220 modeled as unique variables as they exist within the bacterial cell and as the experimental data  
221 measured them. THF<sub>n</sub> and its derivatives are critical to cell functionality due to their connection  
222 to the rest of cellular metabolism [8, 9].

223 The discrete simulation of THF<sub>n</sub> and its derivatives allows for accurate modeling of THF<sub>n</sub>  
224 interconversions to and from its derivative forms. These interconversions feature inhibitory  
225 interactions within the network such as Pte<sub>n</sub> inhibition of TS. In addition, the inhibition of FPGS  
226 by DHF<sub>n</sub> can be included, affecting FPGS' activity on THF<sub>n</sub> and all its derivatives in varying degrees  
227 (Fig 2).

228 An imbalance of glutamation levels across folates from the zero time point is clearly  
229 reflected in the simulation, as it is in the experimental results. The glutamation disruption of  
230 THF<sub>n</sub> and its derivatives is a critical feature of the *TM Model*. TM operates by disrupting  
231 glutamation balance of folates. The spike in DHF<sub>n</sub>, shown in the *TM Model*, results in a sudden  
232 drop in the velocity of all FPGS activities as seen in Fig 4 and as expected by experiments on FPGS  
233 and DHF<sub>n</sub> *in vitro* (Kwon et al.). FPGSTHF2 velocity shows a more relaxed response to the DHF<sub>n</sub>  
234 spike, suggesting some buffering ability in the system.

235 The poor replication of DHF<sub>3</sub> progression and triple glutamated folates overall is a  
236 weakness in the *TM Model*. We suspect it is due to experimental data on enzyme function at  
237 triple glutamation being sparse as compared to experimental data on singly glutamated folates.  
238 Better descriptions of enzyme function at this glutamation level may allow for better modeling in  
239 the future. Most importantly, the increased accuracy of the *TM Model* makes it an excellent  
240 platform for drug design.

## 241 Network rewiring to explore TM alternatives

242 The effort to find a TM alternative centered on established drug design principles of using  
243 multiple antibiotic agents simultaneously and parameter optimization [17-19]. The simulated

244 inhibitors found via optimization in the *Rewired Model* target MS, MTHFR, and SHMT instead of  
245 DHFR alone as seen in Table 1. The overall SSE is driven mainly by inaccuracy in 5mTHF<sub>3</sub>.

246 THF<sub>n</sub> follows the progression seen in the *TM Model*, and DHF<sub>n</sub> drops in concentration in  
247 the *Rewired Model* instead of increasing as it does in the *TM Model*, which is potentially  
248 problematic, since DHF<sub>n</sub> is a primary driver of the effect of *TM*. However, our objective is to find  
249 an alternative and get a disruption in glutamation mix of folates that disrupt cellular metabolism.  
250 Our goal is not simply to replicate the domino effect of *TM*, which causes a spike in DHF<sub>n</sub> and  
251 then inhibits FPGS. 510mTHF<sub>n</sub> and 5mTHF<sub>n</sub> generally (with exception of 5mTHF<sub>3</sub>) follow the same  
252 time course progression in the *Rewired Model* as in the *TM Model*, which is encouraging. THF<sub>n</sub>  
253 and its derivatives are more critical to cell functionality due to their connection to the rest of  
254 cellular metabolism [8, 9]. The drop in DHF<sub>n</sub> introduces an interesting feature of the *Rewired*  
255 *Model*.

256 Despite a poor match to experimental data and the *TM Model* with respect to DHF<sub>n</sub>, this  
257 proposed set of drug targets may replicate the clinical effect of *TM* and Sulfamethoxazole.  
258 Paradoxically, the drop in DHF<sub>n</sub> replicates the task of the drug Sulfamethoxazole, which is used  
259 clinically with *TM* (the target of this drug target search effort). Sulfamethoxazole targets the  
260 enzyme DHFS, which synthesizes DHF<sub>1</sub> and therefore inputs mass into the folate network.  
261 Sulfamethoxazole and *TM* clinically work together to fully shut down flux into and within the  
262 folate network [10, 16, 20]. The proposed inhibitors in the *Rewired Model* also appear to  
263 severely lower the amount of cellular DHF<sub>n</sub>, which is achieved clinically by Sulfamethoxazole. This  
264 means that the proposed set of inhibitors would be effective against some bacterial strains that  
265 show resistance to *TM* and Sulfamethoxazole simultaneously. This is an unexpected but welcome

266 output of the *Rewired Model* which puts the poor SSE score in context and bolsters the result as  
267 a viable set of drug targets.

## 268 Conclusions

269 The current work presents a mathematical model of the *E. coli* folate network that  
270 improves on the previous effort in accuracy, scope, and applicability. A detailed look at TM's  
271 mechanism not only shows the importance of folate polyglutamation levels, but also of enzyme-  
272 metabolite interactions to overall dynamics of the folate cycle. The improved look at this well-  
273 studied system allows a programmatic drug target search for alternatives to both TM and  
274 Sulfamethoxazole. We present this approach as a radically more efficient method to dealing with  
275 antibiotic-resistant bacteria by building on past successes.

## 276 Acknowledgements

277 We thank Rick Dilling and Vivian Callier for their valuable comments.

278

## 279 References

- 280 1. Andersson, D.I. and D. Hughes, *Antibiotic resistance and its cost: is it possible to reverse*  
281 *resistance?* Nat Rev Micro, 2010. **8**(4): p. 260-271.
- 282 2. Stamm, L.V., *Global Challenge of Antibiotic-Resistant Treponema pallidum*. Antimicrobial  
283 Agents and Chemotherapy, 2010. **54**(2): p. 583-589.
- 284 3. Gandhi, N.R., et al., *Multidrug-resistant and extensively drug-resistant tuberculosis: a*  
285 *threat to global control of tuberculosis*. The Lancet. **375**(9728): p. 1830-1843.

- 286 4. El-Halfawy, O.M. and M.A. Valvano, *Chemical Communication of Antibiotic Resistance by*  
287 *a Highly Resistant Subpopulation of Bacterial Cells*. PLoS ONE, 2013. **8**(7): p. e68874.
- 288 5. Baccanari, D.P., et al., *Escherichia coli dihydrofolate reductase: isolation and*  
289 *characterization of two isozymes*. Biochemistry, 1977. **16**(16): p. 3566-3572.
- 290 6. Nijhout, H.F., et al., *A mathematical model of the folate cycle: new insights into folate*  
291 *homeostasis*. J Biol Chem, 2004. **279**(53): p. 55008-16.
- 292 7. Roje, S., *S-Adenosyl-L-methionine: Beyond the universal methyl group donor*.  
293 *Phytochemistry*, 2006. **67**(15): p. 1686-1698.
- 294 8. Miller, B.A. and E.B. Newman, *Control of serine transhydroxymethylase synthesis in*  
295 *Escherichia coli K12*. Canadian Journal of Microbiology, 1974. **20**(1): p. 41-47.
- 296 9. Greene, R.C. and C. Radovich, *Role of methionine in the regulation of serine*  
297 *hydroxymethyltransferase in Escherichia coli*. Journal of Bacteriology, 1975. **124**(1): p. 269-  
298 278.
- 299 10. Kwon, Y.K., et al., *A domino effect in antifolate drug action in Escherichia coli*. Nat Chem  
300 Biol, 2008. **4**(10): p. 602-608.
- 301 11. Kwon, Y.K., M.B. Higgins, and J.D. Rabinowitz, *Antifolate-induced depletion of intracellular*  
302 *glycine and purines inhibits thymineless death in E. coli*. ACS Chem Biol, 2010. **5**(8): p. 787-  
303 95.
- 304 12. Trimmer, E.E., et al., *Folate activation and catalysis in methylenetetrahydrofolate*  
305 *reductase from Escherichia coli: roles for aspartate 120 and glutamate 28*. Biochemistry,  
306 2001. **40**(21): p. 6216-26.



- 307 13. McGuire, J.J., et al., *Enzymatic synthesis of folylpolyglutamates. Characterization of the*  
308 *reaction and its products*. Journal of Biological Chemistry, 1980. **255**(12): p. 5776-5788.
- 309 14. Shane, B., *Pteroylpoly(gamma-glutamate) synthesis by Corynebacterium species.*  
310 *Purification and properties of folypoly(gamma-glutamate) synthetase*. Journal of  
311 Biological Chemistry, 1980. **255**(12): p. 5655-5662.
- 312 15. Lee, J.C., et al., *The prevalence of trimethoprim-resistance-conferring dihydrofolate*  
313 *reductase genes in urinary isolates of Escherichia coli in Korea*. Journal of Antimicrobial  
314 Chemotherapy, 2001. **47**(5): p. 599-604.
- 315 16. Blahna, M.T., et al., *The role of horizontal gene transfer in the spread of trimethoprim–*  
316 *sulfamethoxazole resistance among uropathogenic Escherichia coli in Europe and Canada*.  
317 Journal of Antimicrobial Chemotherapy, 2006. **57**(4): p. 666-672.
- 318 17. Aflaki, E., et al., *Macrophage Models of Gaucher Disease for Evaluating Disease*  
319 *Pathogenesis and Candidate Drugs*. Science Translational Medicine, 2014. **6**(240): p.  
320 240ra73.
- 321 18. Patnaik, S., et al., *Discovery, structure-activity relationship, and biological evaluation of*  
322 *noninhibitory small molecule chaperones of glucocerebrosidase*. J Med Chem, 2012.  
323 **55**(12): p. 5734-48.
- 324 19. Bonhoeffer, S., M. Lipsitch, and B.R. Levin, *Evaluating treatment protocols to*  
325 *prevent antibiotic resistance*. Proceedings of the National Academy of Sciences, 1997.  
326 **94**(22): p. 12106-12111.
- 327 20. Masters, P.A., et al., *TRimethoprim-sulfamethoxazole revisited*. Archives of Internal  
328 Medicine, 2003. **163**(4): p. 402-410.

- 329 21. Gangjee, A., et al., *Potent Dual Thymidylate Synthase and Dihydrofolate Reductase*  
330 *Inhibitors: Classical and Nonclassical 2-Amino-4-oxo-5-arylthio-substituted-6-*  
331 *methylthieno[2,3-d]pyrimidine Antifolates*. Journal of medicinal chemistry, 2008. **51**(18):  
332 p. 5789-5797.
- 333 22. Contestabile, R., et al., *L-Threonine aldolase, serine hydroxymethyltransferase and fungal*  
334 *alanine racemase. A subgroup of strictly related enzymes specialized for different*  
335 *functions*. Eur J Biochem, 2001. **268**(24): p. 6508-25.
- 336 23. Kisliuk, R., *Pteroylpolyglutamates*. Molecular and Cellular Biochemistry, 1981. **39**(1): p.  
337 331-345.
- 338 24. Kisliuk, R.L., et al., *Polyglutamyl derivatives of tetrahydrofolate as substrates for*  
339 *Lactobacillus casei thymidylate synthase*. Biochemistry, 1981. **20**(4): p. 929-934.
- 340 25. Horiuchi, Y., et al., *Coupling effects of distal loops on structural stability and enzymatic*  
341 *activity of Escherichia coli dihydrofolate reductase revealed by deletion mutants*.  
342 Biochimica et Biophysica Acta (BBA) - Proteins and Proteomics, 2010. **1804**(4): p. 846-  
343 855.
- 344 26. Sheng, Y., et al., *Mutation of an essential glutamate residue in folypolyglutamate*  
345 *synthetase and activation of the enzyme by pterooate binding*. Arch Biochem Biophys,  
346 2002. **402**(1): p. 94-103.
- 347 27. Bogнар, A., et al., *Folypoly-gamma-glutamate synthetase-dihydrofolate synthetase*.  
348 *Cloning and high expression of the Escherichia coli folC gene and purification and*  
349 *properties of the gene product*. J Biol Chem, 1985. **260**: p. 5625 - 5630.

- 350 28. Bognar, A.L. and B. Shane, [55] *Bacterial folypoly([gamma]-glutamate) synthase-*  
351 *dihydrofolate synthase*, in *Methods in Enzymology*, D.B.M. Frank Chytil, Editor. 1986,  
352 Academic Press. p. 349-359.
- 353 29. Burton, E., J. Selhub, and W. Sakami, *The substrate specificity of 5-*  
354 *methyltetrahydropteroyltriglutamate-homocysteine methyltransferase*. Vol. 111. 1969.  
355 793-795.
- 356 30. Whitfield, C.D., E.J. Steers, Jr., and H. Weissbach, *Purification and properties of 5-*  
357 *methyltetrahydropteroyltriglutamate-homocysteine transmethylase*. J Biol Chem, 1970.  
358 **245**(2): p. 390-401.
- 359 31. Trimmer, E.E., et al., *Aspartate 120 of Escherichia coli methylenetetrahydrofolate*  
360 *reductase: evidence for major roles in folate binding and catalysis and a minor role in*  
361 *flavin reactivity*. Biochemistry, 2005. **44**(18): p. 6809-22.
- 362 32. McGuire, J. and J. Bertino, *Enzymatic synthesis and function of folypolyglutamates*.  
363 *Molecular and Cellular Biochemistry*, 1981. **38**(1): p. 19-48.
- 364 33. Mansouri, A., J.B. Decker, and R. Silber, *Studies on the regulation of one-carbon*  
365 *metabolism. II. Repression-derepression of serine hydroxymethyltransferase by*  
366 *methionine in Escherichia coli 113-3*. J Biol Chem, 1972. **247**(2): p. 348-52.

367

368

## 369 Supporting information

370 S1 Table. TM Model parameters.

371 S2 Table. SSE Outputs (observations vs simulations).

372 S3 Table. Experimental Data Replicates.

373 S1 Fig. Network Rewiring Reaction Velocities.

374 General flux in the system is lower than in the TM Model, and resultant fluxes over time differ  
375 greatly from that of the TM Model.

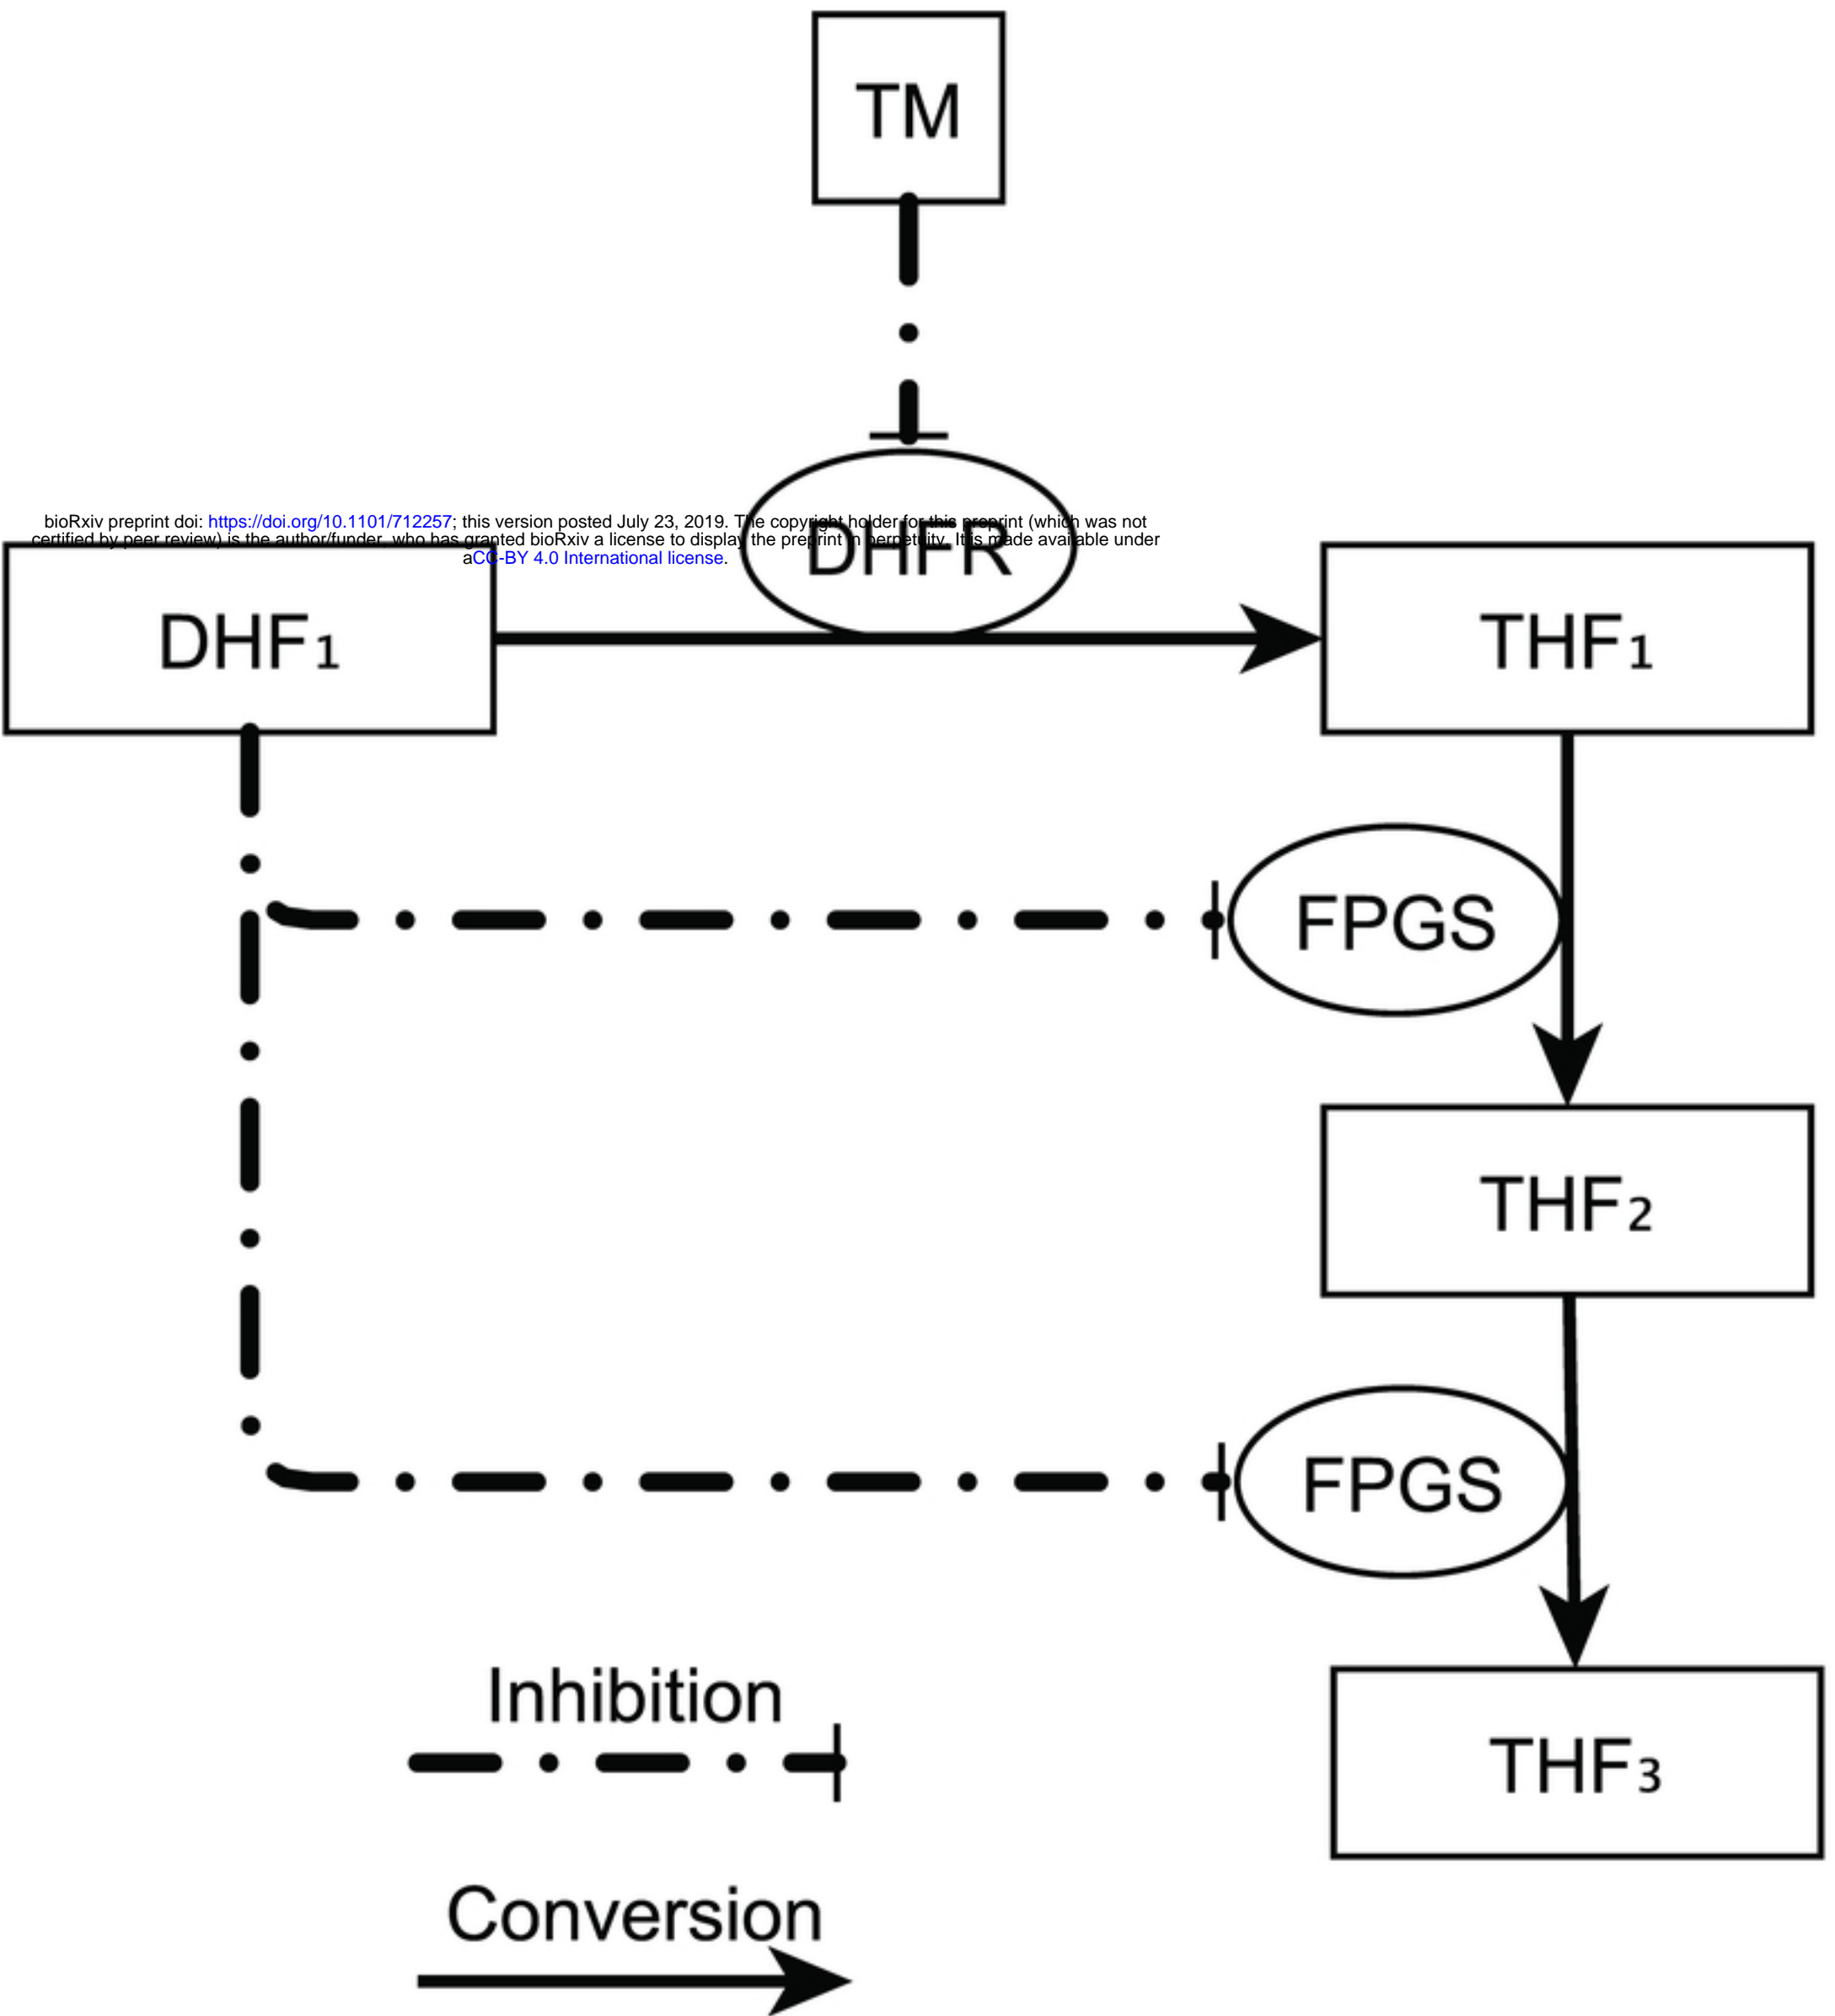

Figure

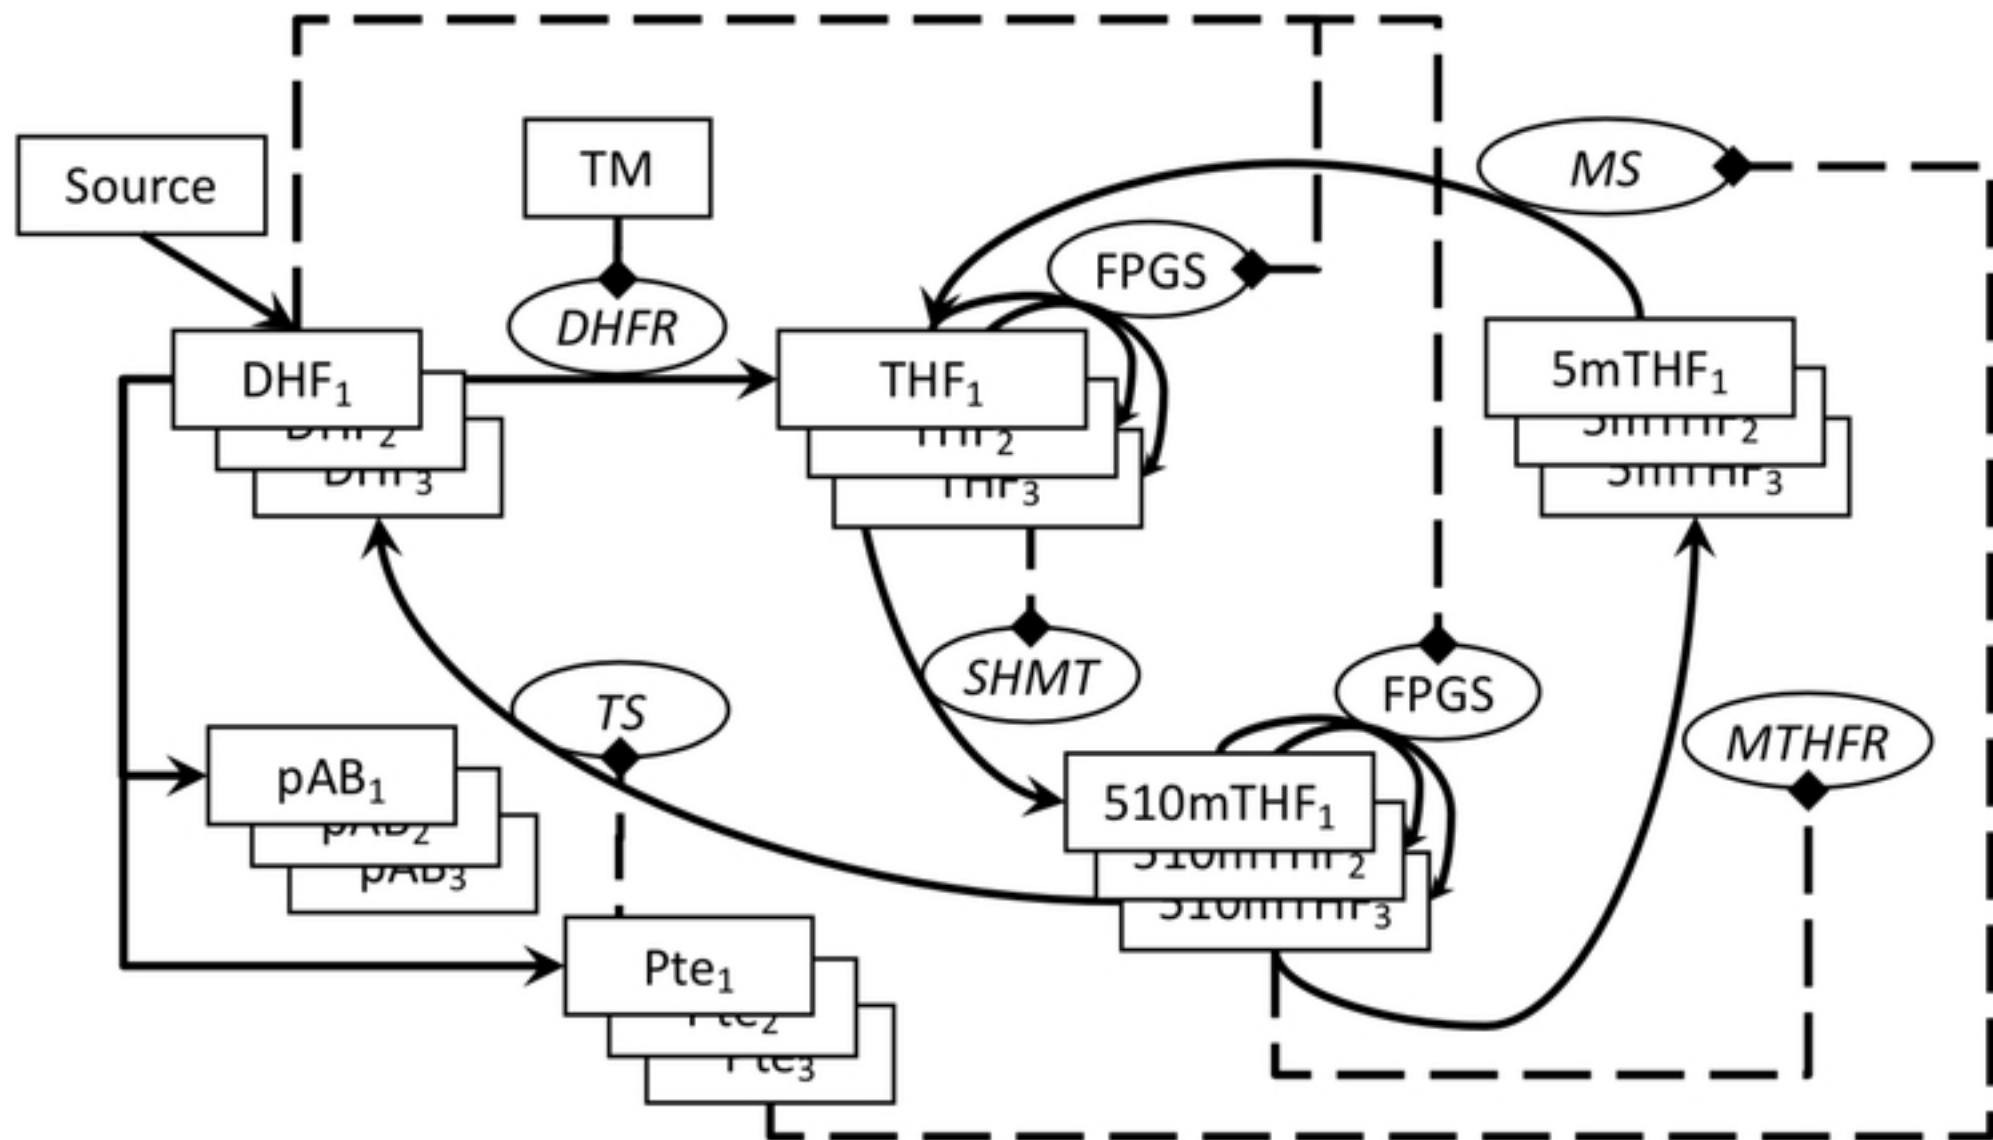

Figure

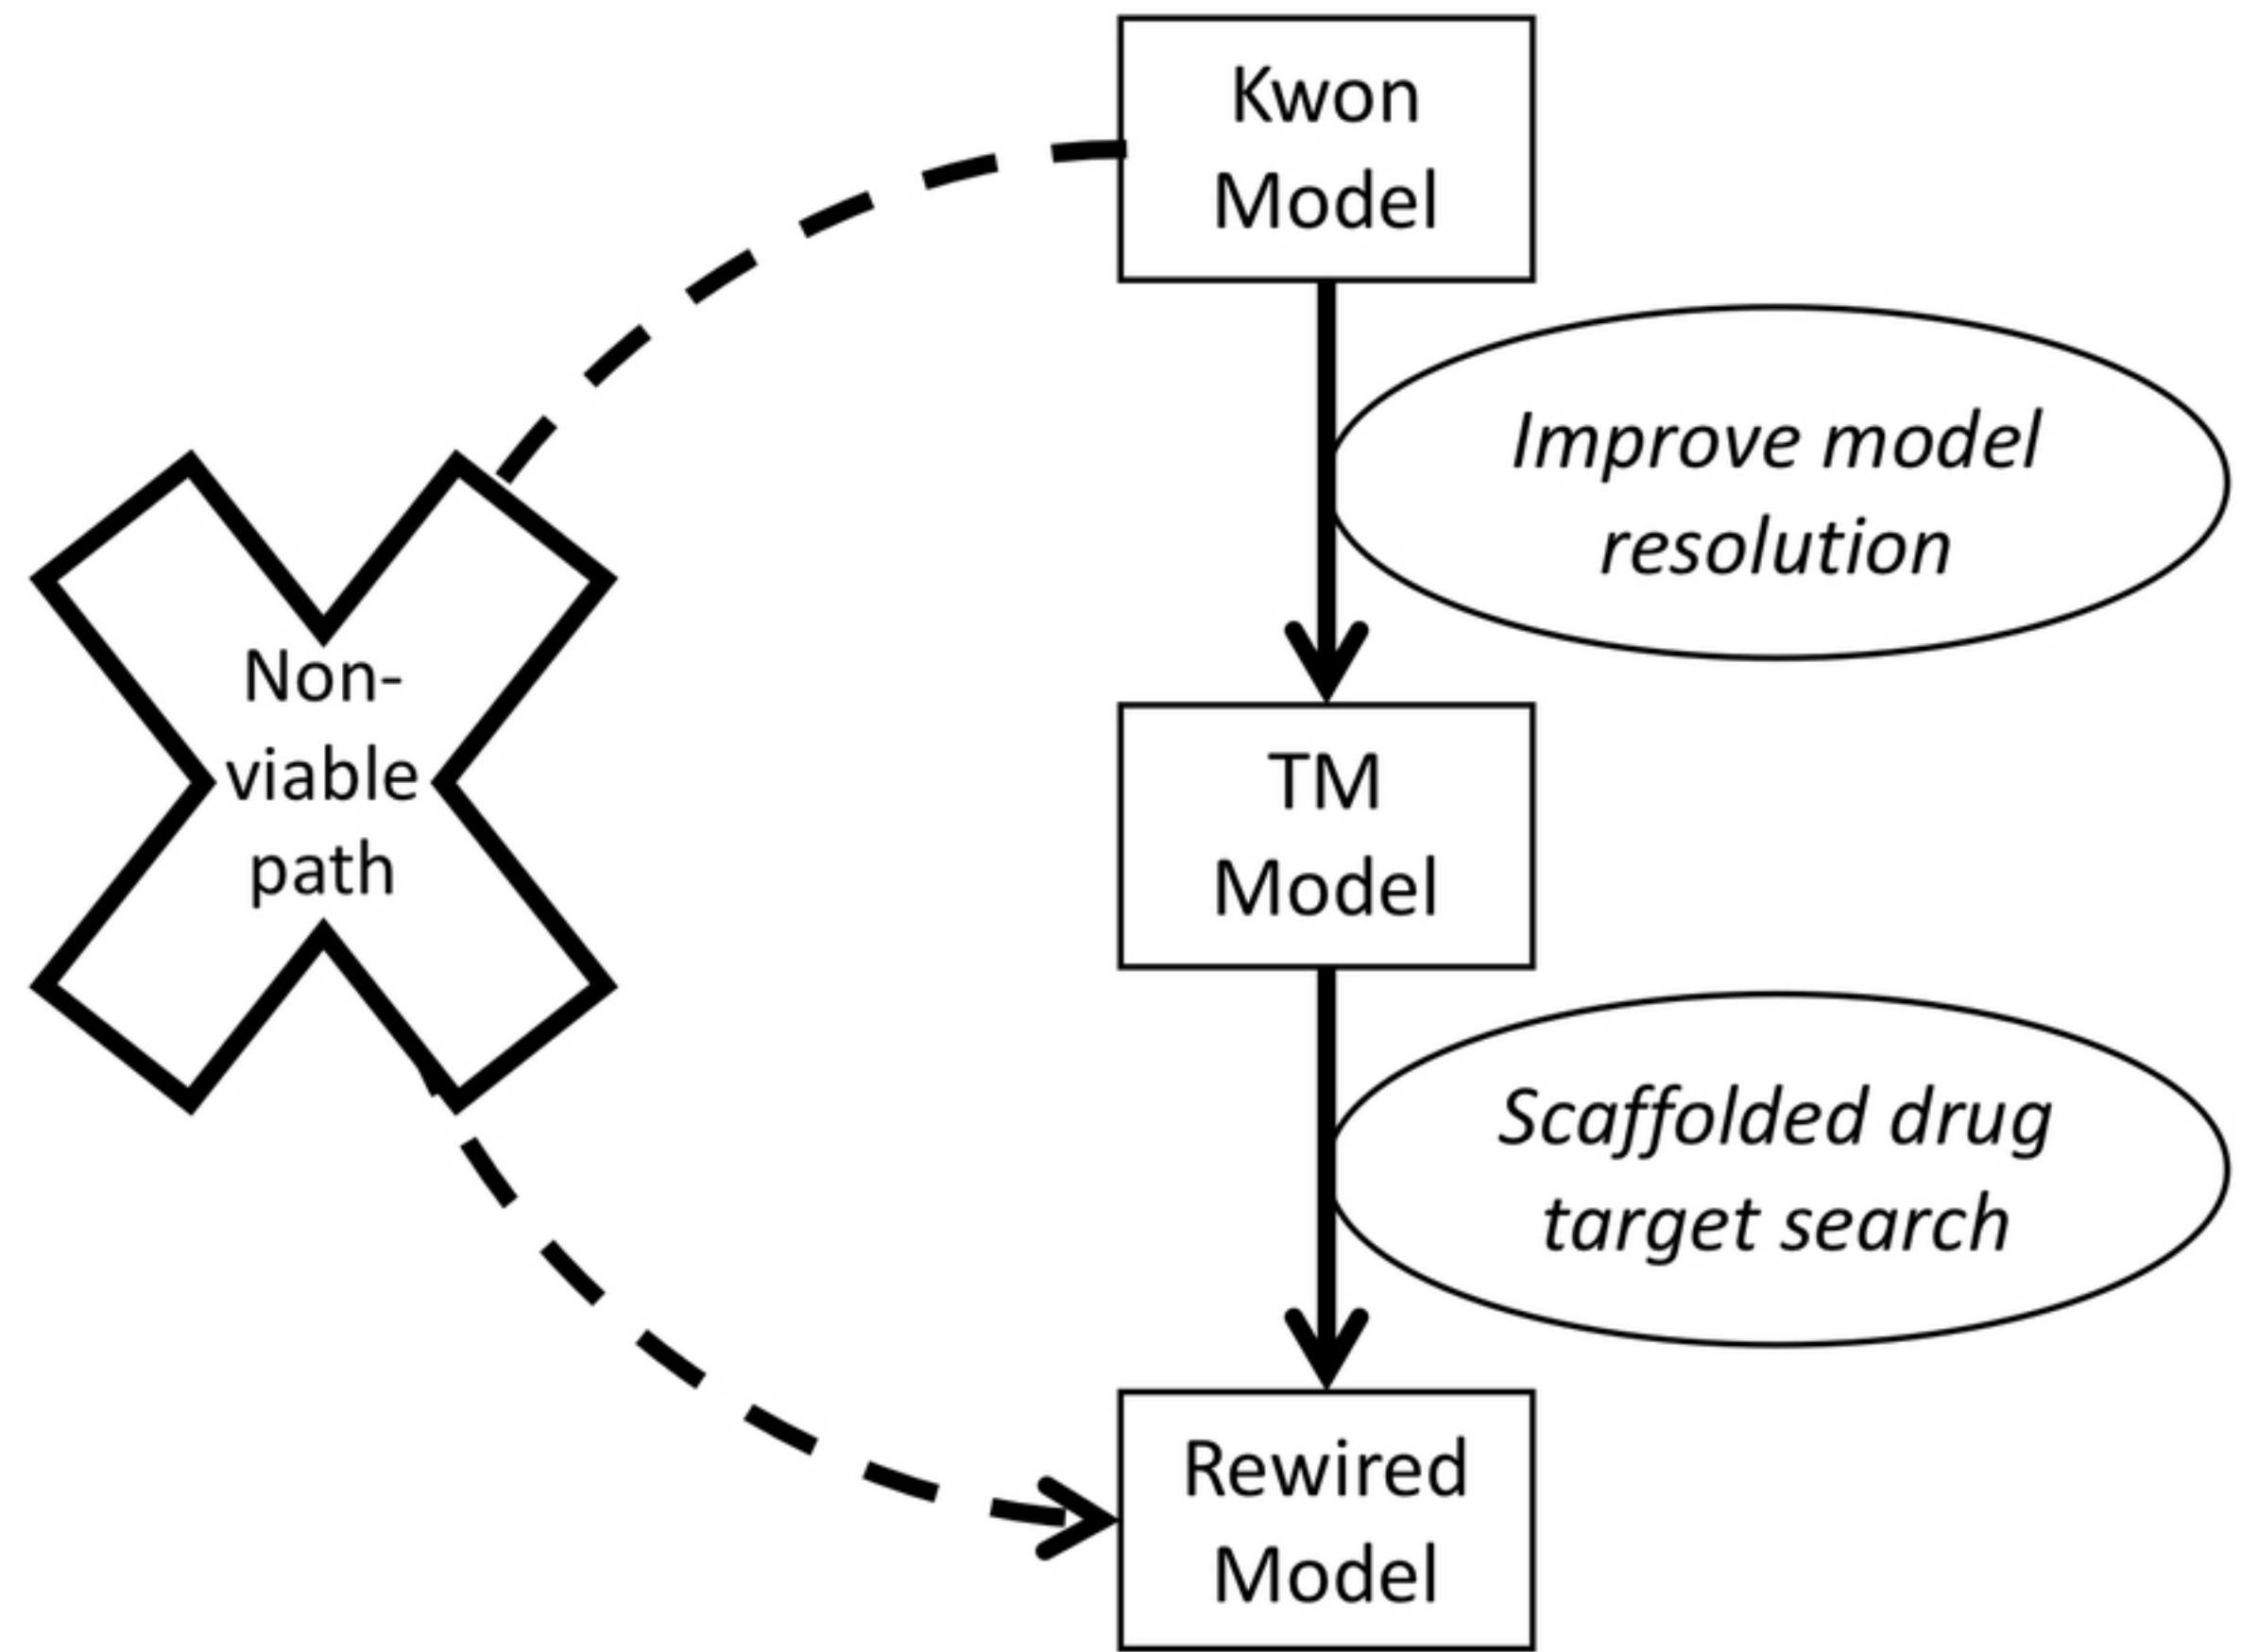

Figure

# Trimethoprim Experimental and Simulated Metabolite Concentrations vs Time

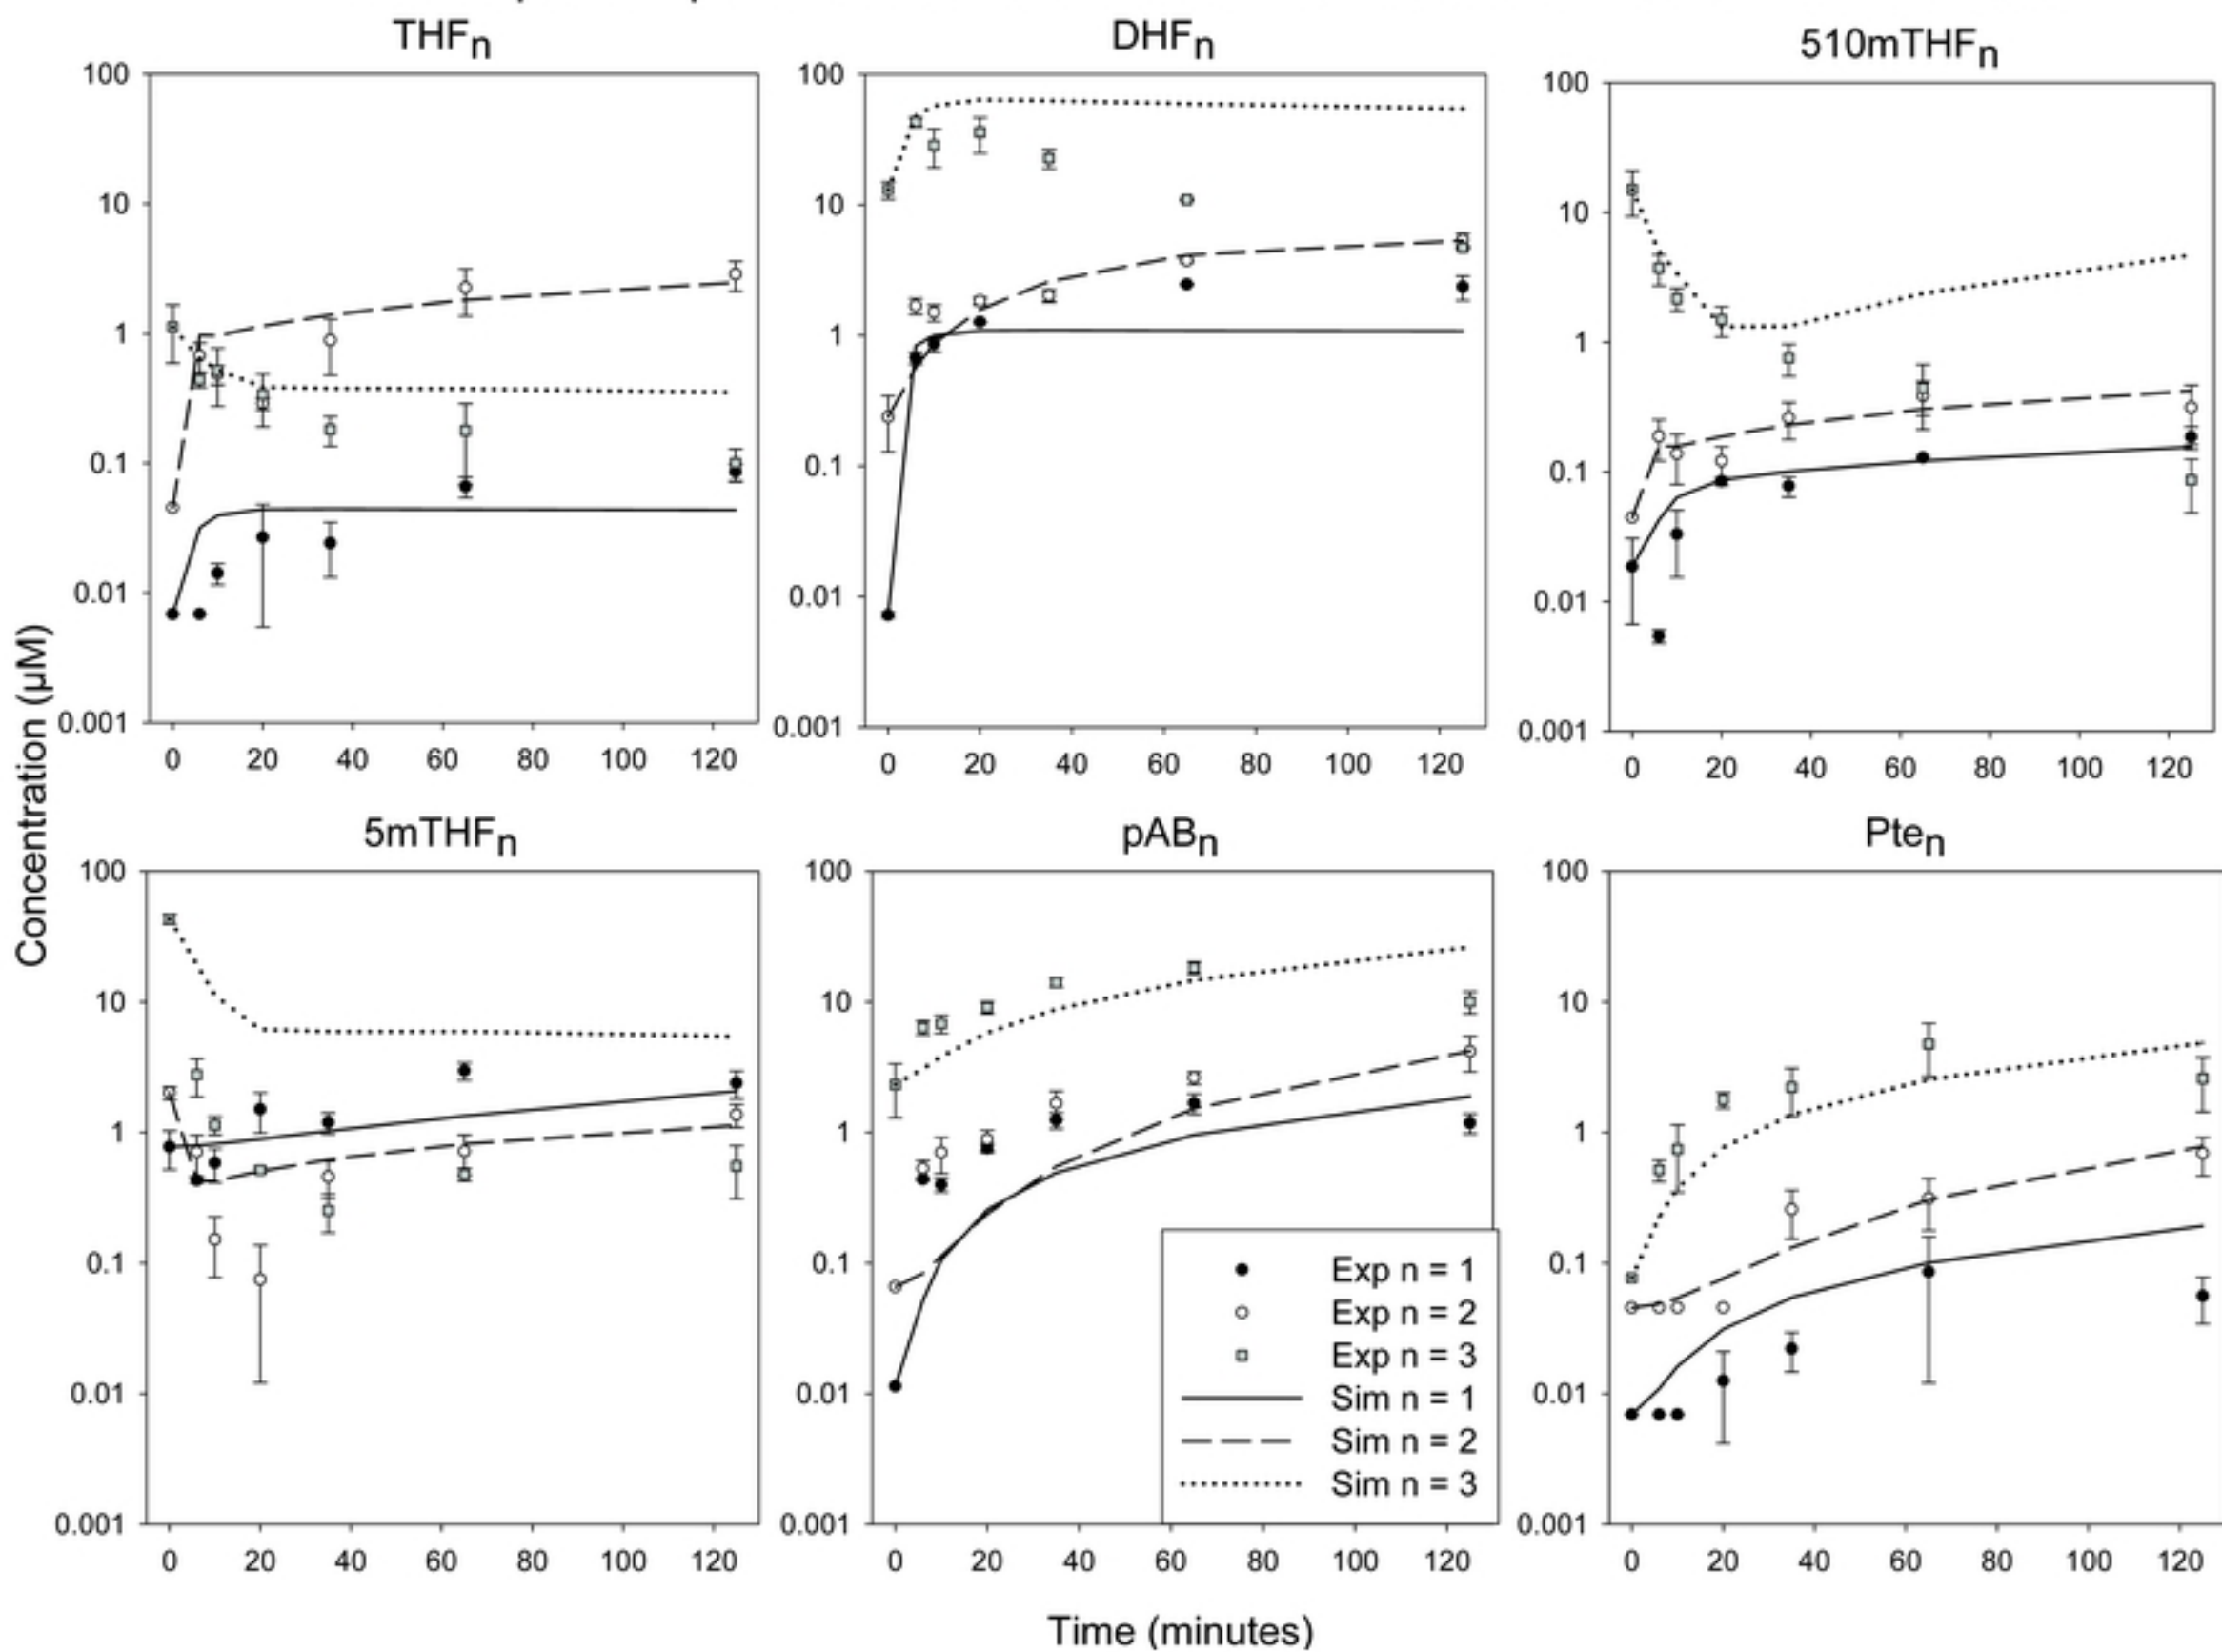

Figure



# Trimethoprim Reaction Velocities vs Time

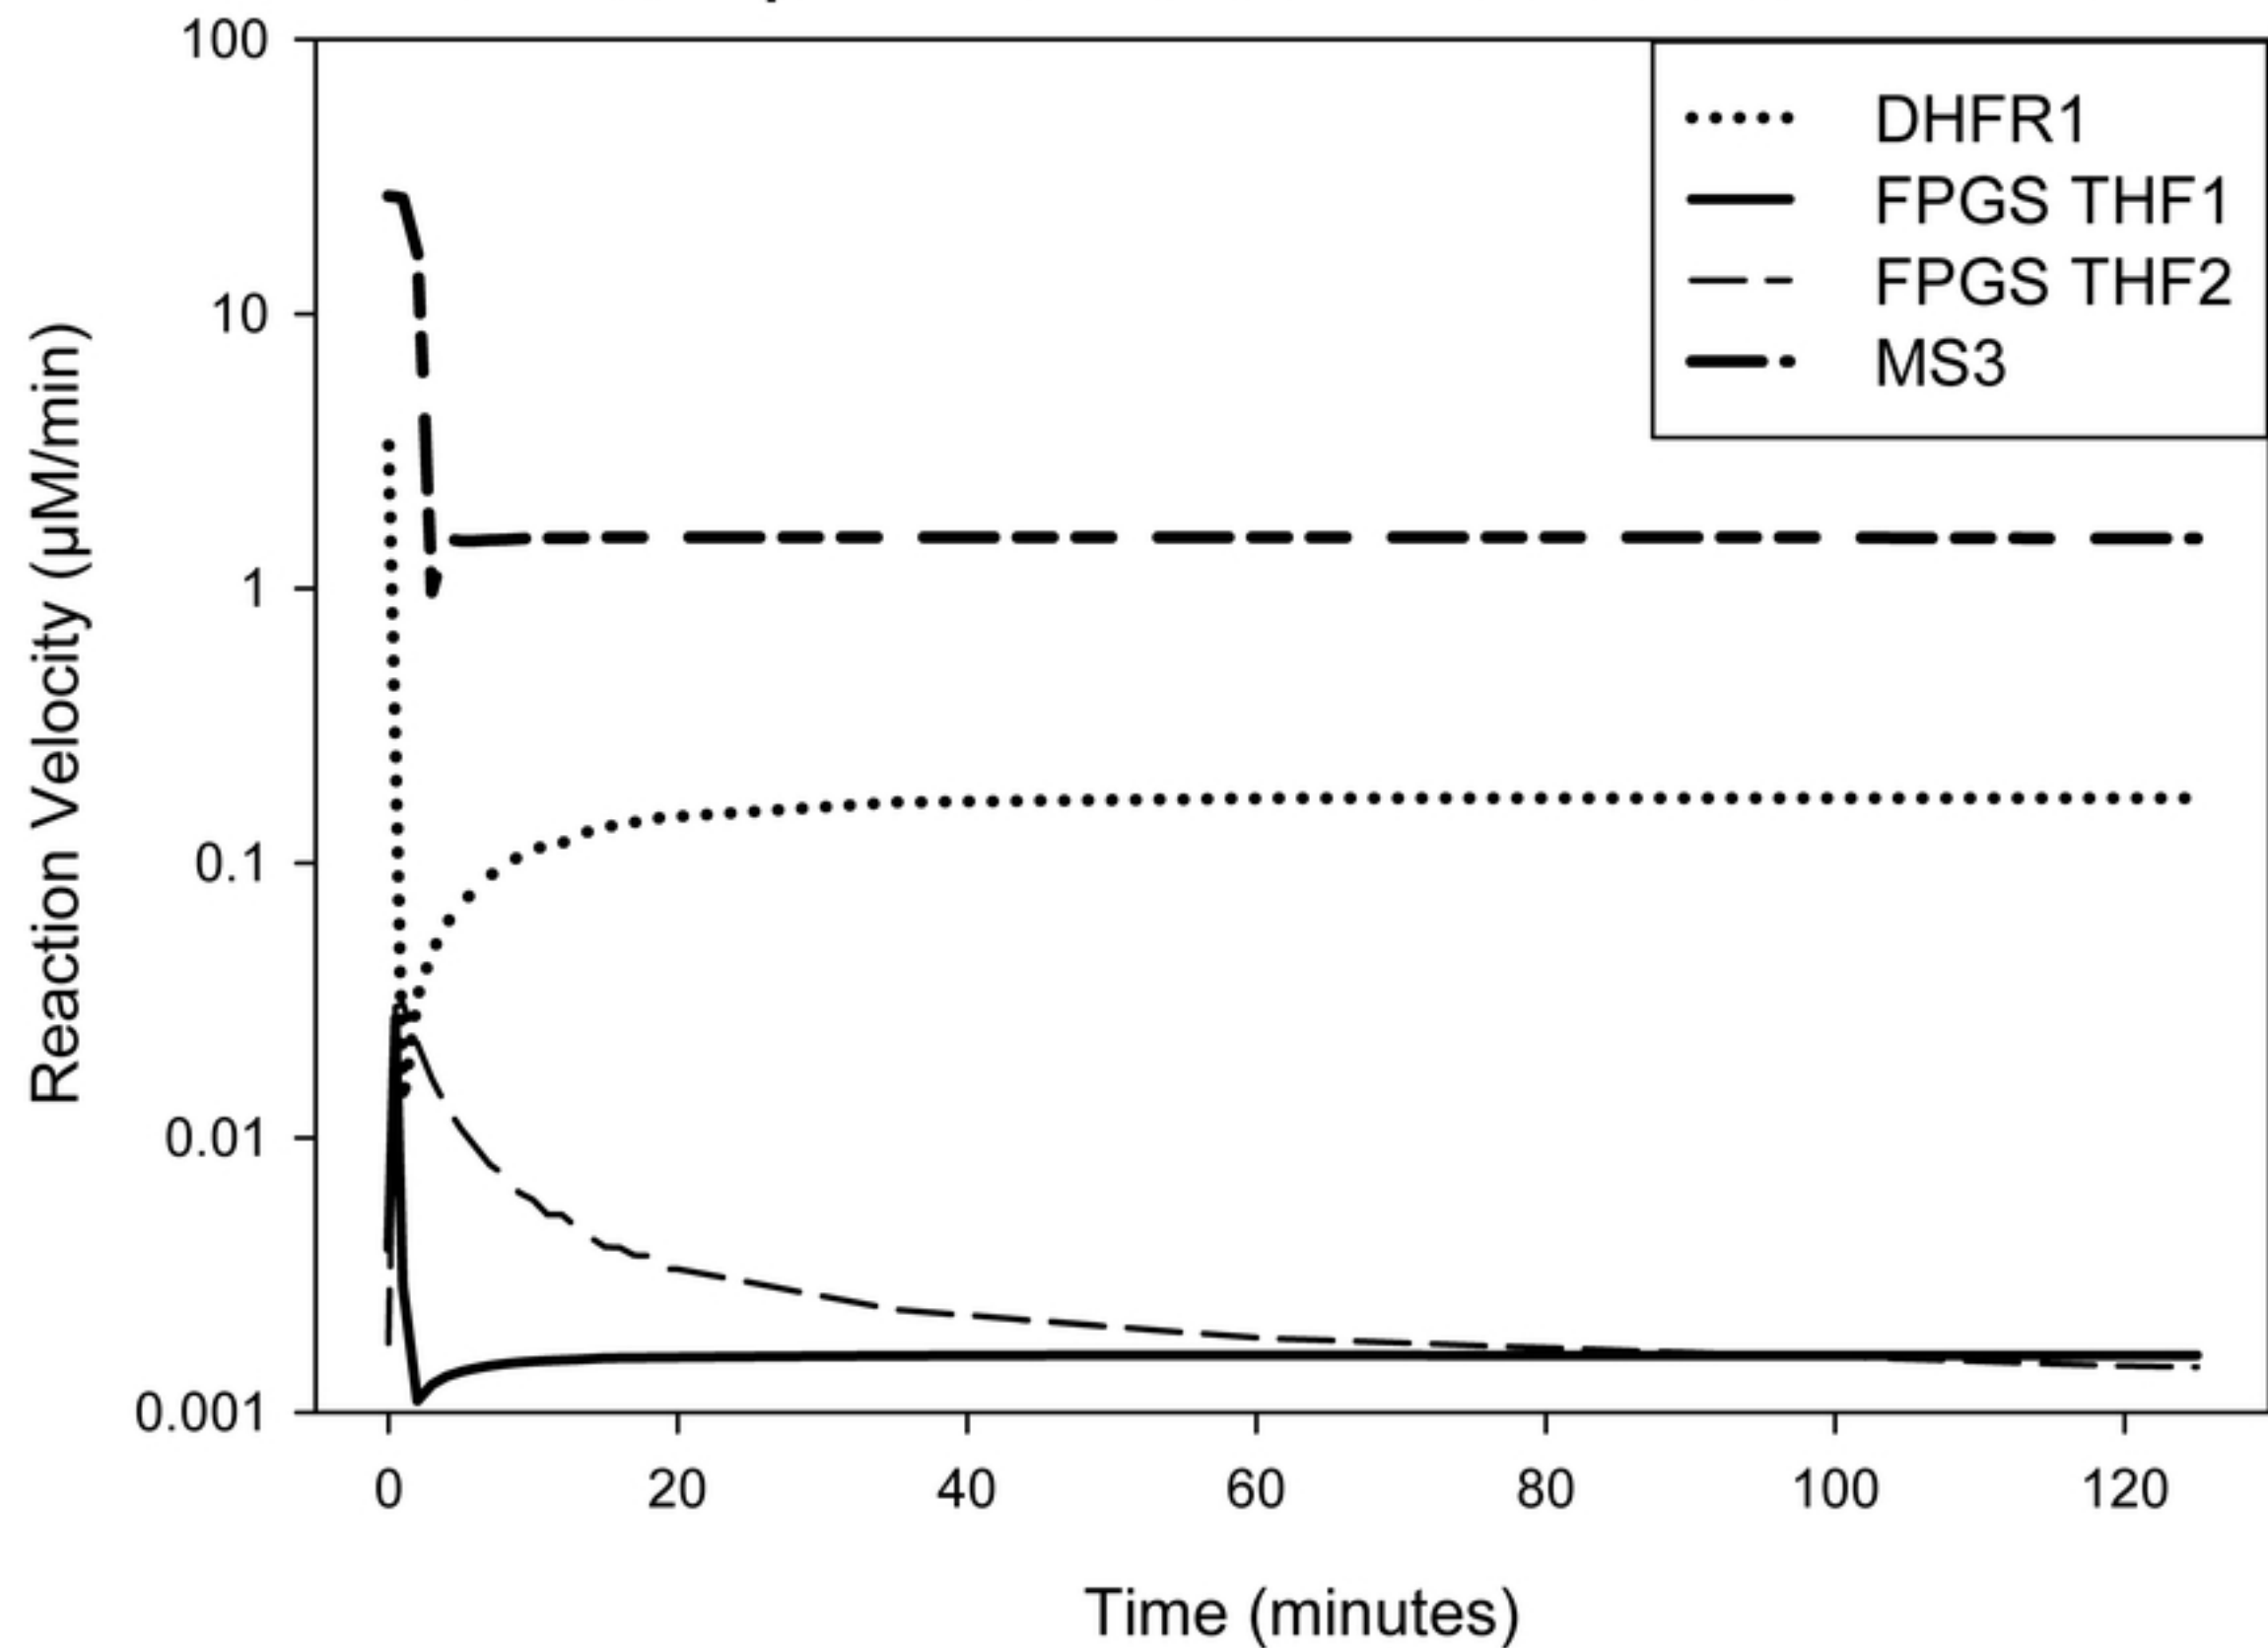

Figure

# Rewired Experimental and Simulated Metabolite Concentrations vs Time

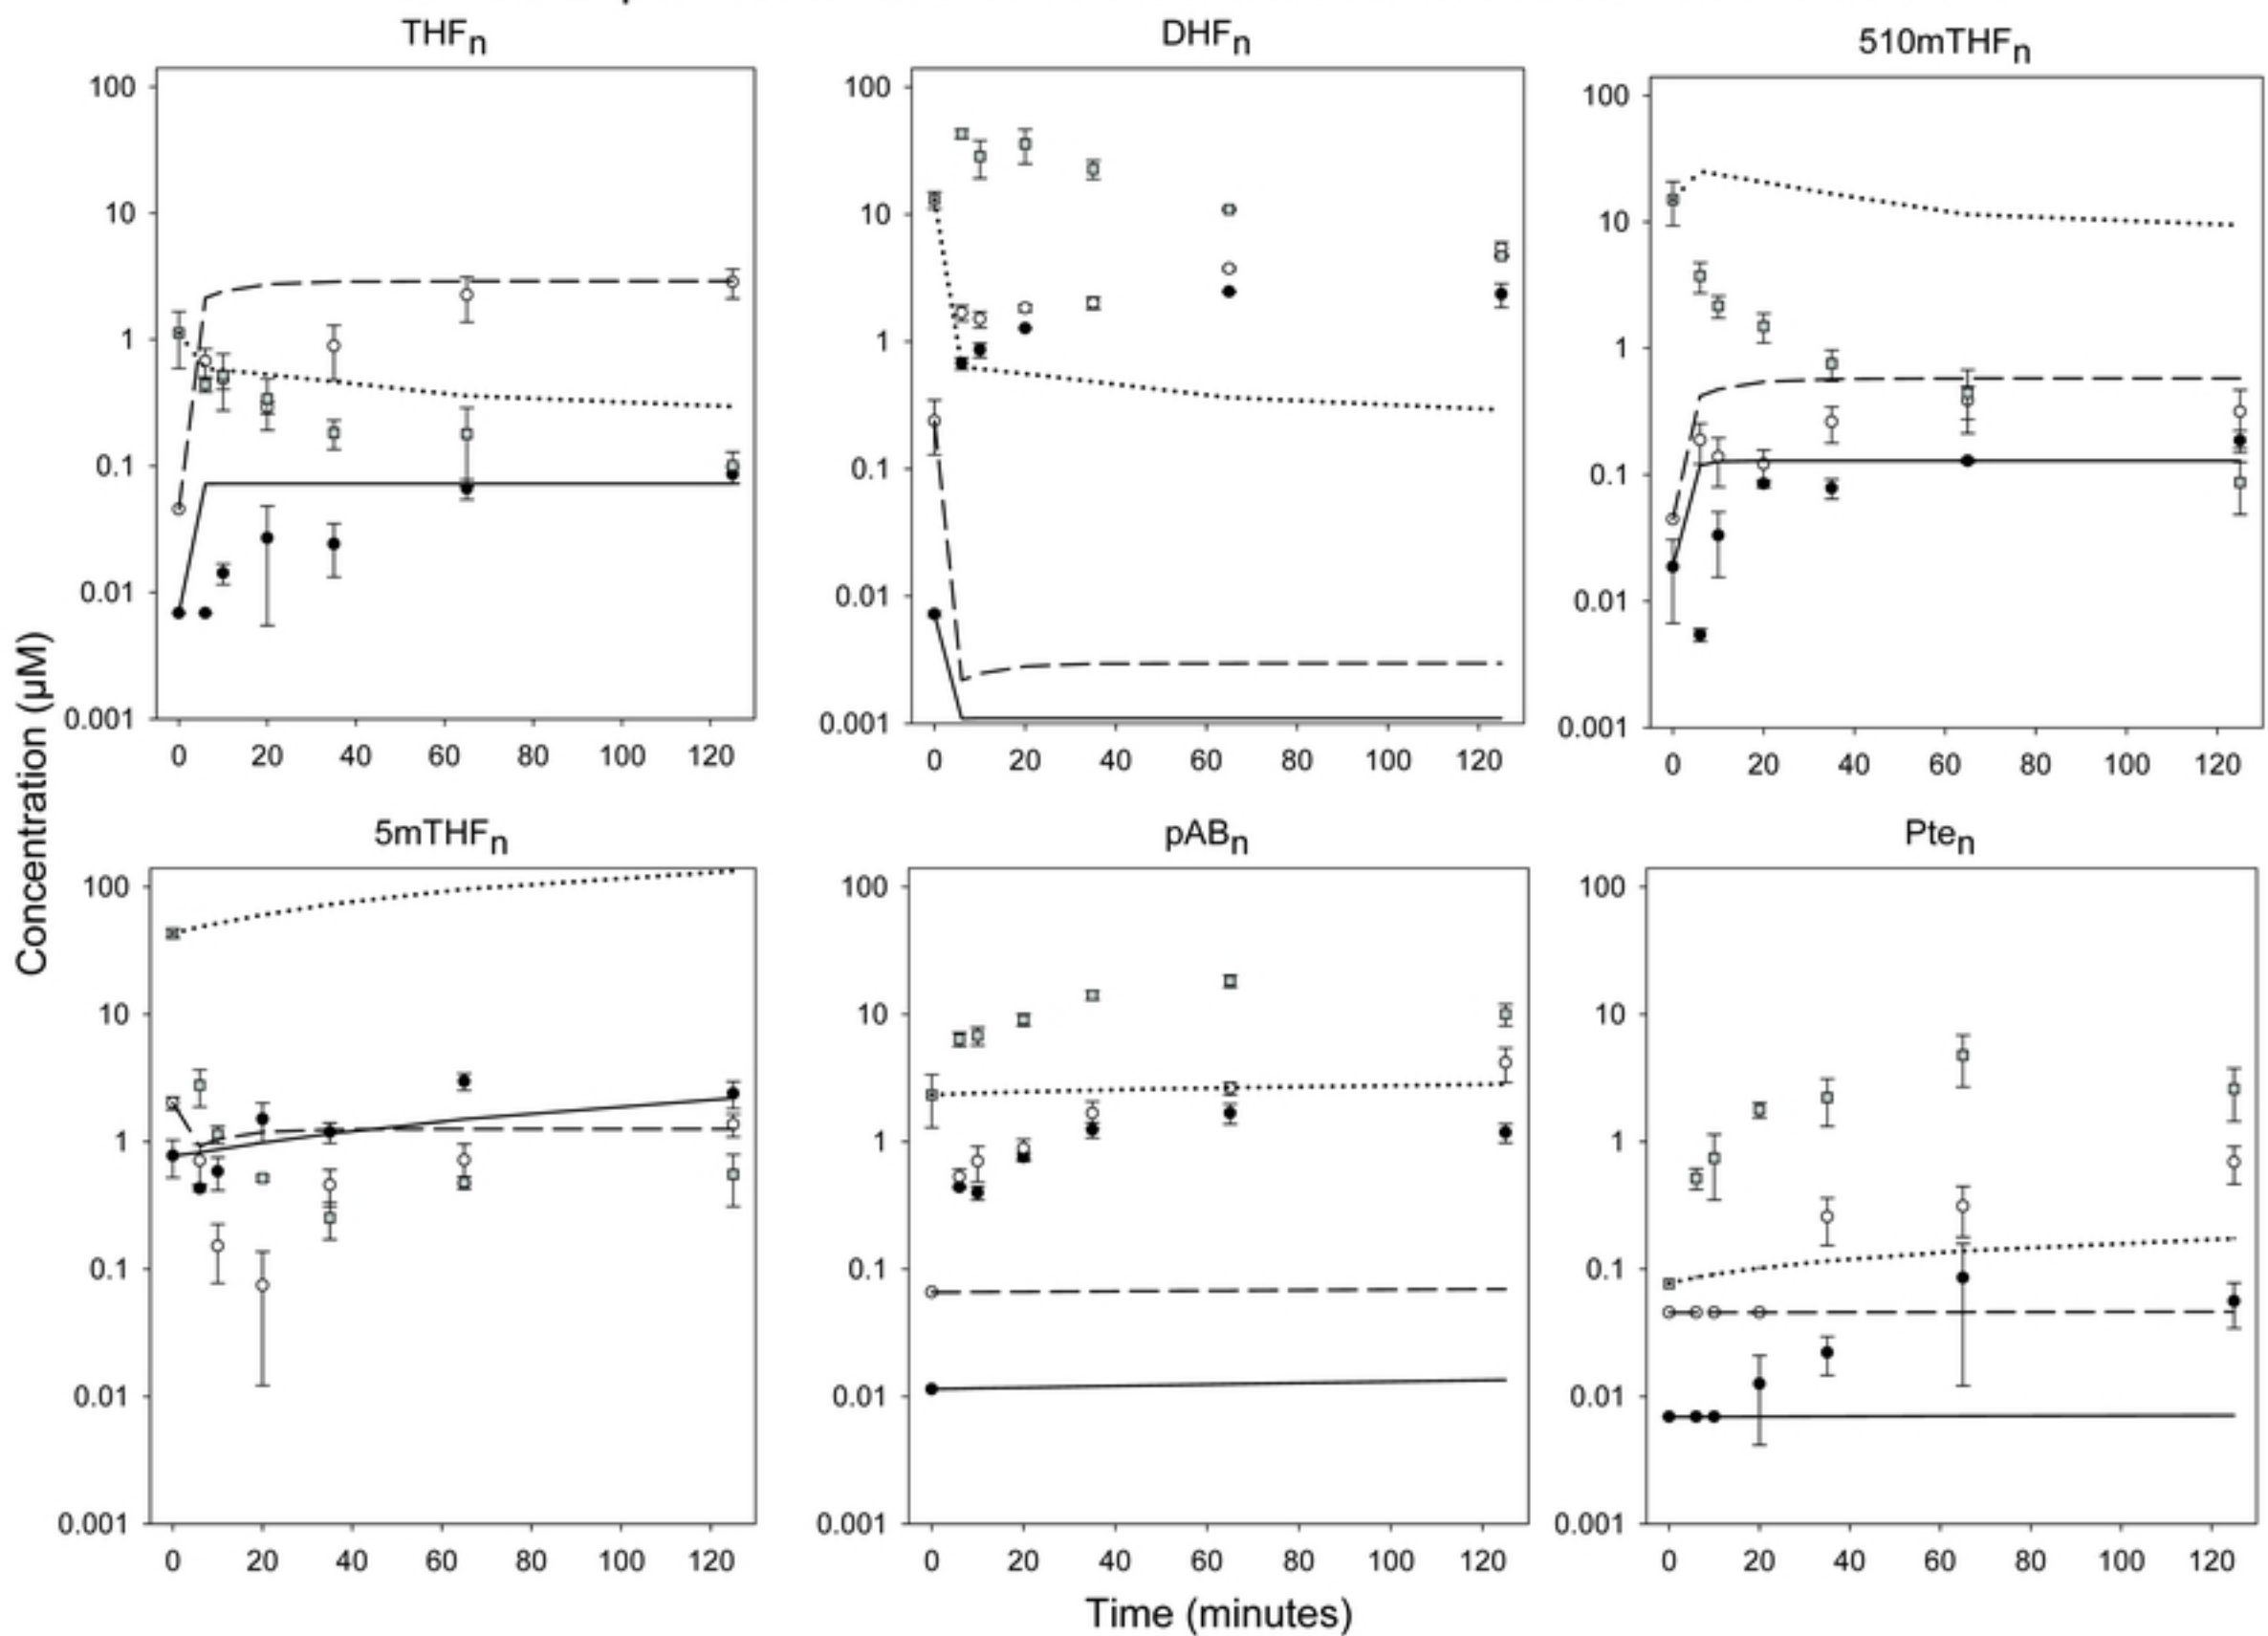

Figure
